# Supplementary material for: Using a Biomimicry Approach in the Design of a Kinetic Façade to Regulate the Amount of Daylight Entering a Working Space
Source: MDPI journal article supplement (doi:10.3390/buildings12122089), 2022-11-29
Supplement: s1 [file s1]

Archive with 1 entries (1 files):
- buildings-1999156-supplementary.pdf
